# Supplementary material for: Saving Time for Patient Care by Optimizing Physician Note Templates: A Pilot Study
Source: Frontiers journal article supplement (doi:10.3389/fdgth.2021.772356), 2022-01-13
Supplement: Data_Sheet_2.PDF [file Data_Sheet_2.PDF]

Department of Pediatrics  
Newborn Nursery  
Admission Note

Admit Date: 07/01/2015 9:20 AM

**Subjective**

Date of birth: 07/01/2015

Time of birth: 0920

Admit date: 07/01/2015

GA Dates: Gestational Age: 39w6d

Apgar scores:

APGAR 1 min: 9

APGAR 5 min: 9

**Maternal Perinatal History:**

Name: Test, Test

Age: 24 y.o.

GP Status: G2P2002

HIV: --/--/NON-REACTIVE/-- (06/24 1419)

HBSAg: NON-REACTIVE (06/24 1419)

GC: NOT DETECTED (06/29 1407)

CT: NOT DETECTED (06/29 1407)

GBS: positive

RPR: Negative (06/24 1419)

Rubella: 1.46 (06/23 1017)

Blood: A/Positive (06/24 1324)

Prenatal care: {Desc; adequate/inadequate}, \*\*\* visits at \*\*\*}

Pregnancy complications: \*\*\*

**Labor Events**

Preterm labor?: No

GBS Status: positive

Antibiotics for GBS given?: Yes

Rupture date: 07/01/2015 Rupture time: 09:00

07/01/2015

Rupture type: Artificial

Induction: AROM, Oxytocin

Augmentation: None

Additional OB: DELIVERY - COMPLICATIONS

complications: History of cesarean section

Perinatal complications: \*\*\*

Prenatal Medications:

**Medications Prior to Admission**

| Medication                                          | Sig                                            |
|-----------------------------------------------------|------------------------------------------------|
| • [DISCONTINUED] aspirin 81 MG Oral Tablet Chewable | Chew 1 tablet daily.                           |
| • ferrous sulfate 325 (65 FE) MG Oral Tablet        | Take 1 tablet by mouth daily (with breakfast). |
| • prenatal multivitamin (VITAFOL-OB) Oral Tablet    | Take 1 tablet by mouth daily.                  |

**Delivery Method:** VBAC, Spontaneous**ROM:** 13h 52m**Peds called:** {JX YES/NO}**Resuscitation:** None**Cord Blood pH:**

| pH, Cord Art | Date       | Value    | Ref Range   | Status |
|--------------|------------|----------|-------------|--------|
|              | 07/01/2015 | 7.29 (L) | 7.32 - 7.42 | Final  |

**Calculated Base Excess**

| Date       | Value | Ref Range    | Status |
|------------|-------|--------------|--------|
| 07/01/2015 | 0.5   | 0 - 2 MMOL/L | Final  |

**Objective****Birth Weight:** 2990 g (6 lb 9.5 oz) (Filed from Delivery Summary), {AGA/SGA/LGA}**Length:****Ht Readings from Last 1 Encounters:**

07/01/2015 48.9 cm (19.25") (27 %, Z= -0.62)\*

\* Growth percentiles are based on Fenton (Girls, 22-50 Weeks) data.

27 %ile (Z= -0.62) based on Fenton (Girls, 22-50 Weeks) Length-for-age data based on Length recorded on 07/01/2015.

**Head Circumference:****HC Readings from Last 1 Encounters:**

07/01/2015 31.5 cm (12.4") (1 %, Z= -2.26)\*

\* Growth percentiles are based on Fenton (Girls, 22-50 Weeks) data.

1 %ile (Z= -2.26) based on Fenton (Girls, 22-50 Weeks) head circumference-for-age based on Head Circumference recorded on 07/01/2015.

**Admission Exam date and time:** 07/01/2015 10:00 AM**General:** alert, in no acute distress, no dysmorphic features**Head:** fontanelles open, soft, flat and normal size**Eyes:** sclera white; pupils equal and reactive; **red reflex present both eyes****Ears:** well-positioned, well-formed pinnae, no preauricular sinuses or tags**Nose:** clear, normal mucosa**Mouth:** normal tongue, palate intact**Neck:** normal structure**Chest:** lungs clear to auscultation, unlabored breathing**Heart:** regular rate and rhythm; no murmurs

**Abdomen/Anus:** soft, non-tender, non-distended; without masses or hepatosplenomegaly; anus patent; umbilical stump clean and dry  
**Pulses:** strong equal femoral pulses, brisk capillary refill  
**Hips:** negative Barlow, Ortolani, gluteal creases equal  
**GU:** normal female genitalia  
**Extremities:** well-perfused, warm and dry; clavicles intact  
**Spine:** normal, symmetric, no sacral tufts, tags or dimples  
**Skin:** warm, dry and intact  
**Neurologic:** easily aroused; good symmetric tone and strength; positive root and suck; symmetric normal reflexes

#### Patient Active Problem List

##### Diagnosis

- Single liveborn infant delivered vaginally

#### Assessment

Baby GIRL/Test, Test is an Gestational Age: 39w6d week {AGA/SGA/LGA} female infant born via Delivery Method: VBAC, Spontaneous now 1 hour.

#### Plan

##### Continue neonatal care.

- Watch for infant to void and stool
- Hepatitis B immunization
- Erythromycin ointment to eyes
- Vitamin K injection
- Hearing test (OAE)
- Congenital heart disease screen (upper/lower extremity SpO2 check @ 24 hrs)
- 40 hr bili and newborn metabolic screen \*\*\* @ \*\*\*

##### Will provide anticipatory guidance.

##### Will need follow-up with PCP 1-2 days after discharge.

Me, MD

07/01/2015 10:30 AM

#### Example 2: History and physical post-optimization

Blue highlight: Auto generated data. \*\*\*: Manual entry of data required. { }: Pick list. Epic codes are omitted.

Yo: Year old. GP: Gravida para. HIV: Human immunodeficiency virus, HBSAg: Hepatitis B antigen. GC: Gonorrhea. CT: Chlamydia. GBS: Group B streptococcus. RPR: Rapid plasma reagin. VBAC: Vaginal birth after cesarean section. ROM: Rupture of membranes. Peds: Pediatrics. GA: Gestational age. AGA: Appropriate for gestational age. SGA: Small for gestational age. LGA: Large for gestational age. OAE: Otoacoustic emissions. SpO2: Oxygen saturation. Bili: Bilirubin.
