# Supplementary material for: Saving Time for Patient Care by Optimizing Physician Note Templates: A Pilot Study
Source: Frontiers journal article supplement (doi:10.3389/fdgth.2021.772356), 2022-01-13
Supplement: Data_Sheet_5.PDF [file Data_Sheet_5.PDF]

**Department of Pediatrics  
Newborn Nursery  
Discharge Summary**

Date of birth: 07/01/2015

Time of birth: 0920

Admit date: 07/01/2015

Discharge date and time: 07/03/2015 10:30 AM

GA Dates: Gestational Age: 39w6d

Apgar scores:

APGAR 1 min: 9

APGAR 5 min: 9

**Maternal Perinatal History:**

Mother's name: Test, Test

Mother's DOB: 4/7/1997

Mother's Age: 24 y.o.

GP status: G2P2002

**Prenatal labs:**

HIV: {POSITIVE/NEGATIVE/UNKNOWN}

HepBSAg: {POSITIVE/NEGATIVE/UNKNOWN}

GC: {POSITIVE/NEGATIVE/UNKNOWN}

CT: {POSITIVE/NEGATIVE/UNKNOWN}

GBS: {Positive/Negative/Pending/Never Tested} **\*\*\* Please make sure to verify ALL maternal prenatal lab results before signing discharge summary. Delete this line once completed.**

RPR: {reactive/non-reactive}

Rubella: {Desc; immune/not/unknown}

Blood: {misc; blood types}

Prenatal care: {Desc; adequate/inadequate}, \*\*\* visits at \*\*\*

Pregnancy complications: \*\*\*

Perinatal complications: \*\*\*

Prenatal medications: \*\*\*

Delivery Method: VBAC, Spontaneous

ROM: \*\*\*

Peds called: {JX YES/NO}

Resuscitation: \*\*\*

**Admission Physical:**

Birth weight: 2990 g (6 lb 9.5 oz) (Filed from Delivery Summary)

{AGA/SGA/LGA}

**Birth Weight:** 2990 g (6 lb 9.5 oz) (Filed from Delivery Summary), {AGA/SGA/LGA}

**Length:**

**Ht Readings from Last 1 Encounters:**

07/01/2015 48.9 cm (19.25") (27 %, Z= -0.62)\*

\* Growth percentiles are based on Fenton (Girls, 22-50 Weeks) data.

27 %ile (Z= -0.62) based on Fenton (Girls, 22-50 Weeks) Length-for-age data based on Length recorded on 07/01/2015.

**Head Circumference:**

**HC Readings from Last 1 Encounters:**

07/01/2015 31.5 cm (12.4") (1 %, Z= -2.26)\*

\* Growth percentiles are based on Fenton (Girls, 22-50 Weeks) data.

1 %ile (Z= -2.26) based on Fenton (Girls, 22-50 Weeks) head circumference-for-age based on Head Circumference recorded on 07/01/2015.

**Admission physical exam** was normal except for \*\*\*. Red reflex was present bilaterally on admission.

**Laboratory/Diagnostic Tests:**

**Results for orders placed or performed during the hospital encounter of 10/26/21 (from the past 72 hour(s))**

**Blood Gas Arterial, Cord**

Collection Time: 07/01/2015 10:20 AM

| Result                 | Value    |
|------------------------|----------|
| Specimen Type          | Other    |
| Site                   | V.CORD   |
| Allens Test            | No       |
| pH, Cord Art           | 7.35     |
| pO2, Cord Art          | 41.0     |
| Calculated Bicarbonate | 24.8     |
| Calculated Base Excess | -1.1 (L) |
| Calculated O2          | 73.2     |
| PCO Cord Arterial      | 45       |

**Blood Gas Arterial, Cord**

Collection Time: 07/01/2015 10:20 AM

| Result                 | Value    |
|------------------------|----------|
| Specimen Type          | Other    |
| Site                   | A.CORD   |
| Allens Test            | No       |
| pH, Cord Art           | 7.29 (L) |
| pO2, Cord Art          | 19.0     |
| Calculated Bicarbonate | 28.4     |
| Calculated Base Excess | 0.5      |
| Calculated O2          | 23.0     |
| PCO Cord Arterial      | 59       |

**POCT bilirubinometry**

Collection Time: 07/03/2015 1:21 AM

| Result       | Value |
|--------------|-------|
| Bilirubin Tc | 7.6   |

**Nutrition:** {breast, formula, breast and formula, \*\*\*}

## Discharge Physical:

| Vitals:  | 09/02/2015 30   | 09/03/15 0125        | 09/03/15 0330     | 09/03/15 0800     |
|----------|-----------------|----------------------|-------------------|-------------------|
| BP:      |                 |                      |                   |                   |
| Pulse:   | 128             |                      | 120               | 160               |
| Resp:    | 52              |                      | 40                | 42                |
| Temp:    | 37.2 °C (99 °F) |                      | 37.1 °C (98.8 °F) | 37.4 °C (99.3 °F) |
| TempSrc: | Axillary        |                      | Axillary          | Axillary          |
| Weight:  |                 | 2830 g (6 lb 3.8 oz) |                   |                   |
| Height:  |                 |                      |                   |                   |
| HC:      |                 |                      |                   |                   |

Discharge weight: \*\*\*

Weight Change Since Birth: \*\*\*

**General:** alert, in no acute distress, no dysmorphic features

**Head:** fontanelles open, soft, flat and normal size, HC \*\*\* cm

**Eyes:** sclera white; pupils equal and reactive

**Ears:** well-positioned, well-formed pinnae, no preauricular sinuses or tags

**Nose:** clear, normal mucosa

**Mouth:** normal tongue, palate intact

**Neck:** normal structure

**Chest:** lungs clear to auscultation, unlabored breathing

**Heart:** regular rate and rhythm; no murmurs

**Abdomen/Anus:** soft, non-tender, non-distended; without masses or hepatosplenomegaly; anus patent; umbilical stump clean and dry

**Pulses:** strong equal femoral pulses, brisk capillary refill

**Hips:** negative Barlow, Ortolani, gluteal creases equal

**GU:** normal \*\*\* genitalia

**Extremities:** well-perfused, warm and dry; clavicles intact

**Spine:** normal, symmetric, no sacral tufts, tags or dimples

**Skin:** warm, dry and intact

**Neurologic:** easily aroused; good symmetric tone and strength; positive root and suck; symmetric normal reflexes

## Newborn Hearing Screen (OAE):

\*\*\*

## Immunization History

| Administered                                 | Date(s) Administered |
|----------------------------------------------|----------------------|
| • Hepatitis B Vaccine (Peds/Adol 3-dose), IM | 07/01/2015           |

Anticipatory guidance performed: \*\*\*

## Patient Active Problem List

| Diagnosis                                    |
|----------------------------------------------|
| • Single liveborn infant delivered vaginally |

**Hospital Course:** Baby GIRL/Test Test was born on 07/01/2015 at 0920 at Gestational Age: 39w6d via Delivery Method: VBAC, Spontaneous to a 24 y.o. G2P2002. Peds {WAS/WAS NOT} called and no resuscitation was required. \*\*\* Baby did well overall and has fed, voided and stoolled appropriately. Mom received anticipatory guidance on caring for her new baby. No other acute issues arose during this admission. Baby deemed medically stable for discharge. Baby to f/u with \*\*\* in 1-2 days.

- Baby's 24 hour and \*\*\*% in both upper and lower extremities.
- Baby's 40 hour bilirubin was \*\*\*
- Birth weight was 2990 g (6 lb 9.5 oz) (Filed from Delivery Summary)
- Discharge weight was \*\*\*
- Admission weight change of \*\*\*
- Infant {WAS/WAS NOT:"was not"} circumcised during his newborn hospital stay.  
\*\*\*delete this bullet point for females\*\*\*

**Studies pending:** {None:"None"}

**Special Follow-up Needed:** {None:"None"}

**Discharge Instructions:** Standard newborn care instructions and anticipatory guidance were provided to the mother prior to discharge.

Me, MD

07/03/2015 10:30 AM

#### Example 5: Discharge summary pre-optimization

Blue highlight: Auto generated data. \*\*\*: Manual entry of data required. { }: Pick list. Epic codes are omitted.

Yo: Year old. GP: Gravida para. HIV: Human immunodeficiency virus, HBSAg: Hepatitis B antigen. GC: Gonorrhea. CT: Chlamydia. GBS: Group B streptococcus. RPR: Rapid plasma reagin. VBAC: Vaginal birth after cesarean section. ROM: Rupture of membranes. Peds: Pediatrics. GA: Gestational age. AGA: Appropriate for gestational age. SGA: Small for gestational age. LGA: Large for gestational age. OAE: Otoacoustic emissions. SpO2: Oxygen saturation. Bili: Bilirubin.
