# Supplementary material for: Saving Time for Patient Care by Optimizing Physician Note Templates: A Pilot Study
Source: Frontiers journal article supplement (doi:10.3389/fdgth.2021.772356), 2022-01-13
Supplement: Data_Sheet_6.PDF [file Data_Sheet_6.PDF]

Department of Pediatrics  
Newborn Nursery  
Discharge Summary

Admit Date: 07/01/2015 9:20 AM

**Subjective**

Date of birth: 07/01/2015

Time of birth: 0920

Admit date: 07/01/2015

GA Dates: Gestational Age: 39w6d

Apgar scores:

APGAR 1 min: 9

APGAR 5 min: 9

**Maternal Perinatal History:**

Name: Test, Test

Age: 24 y.o.

GP Status: G2P2002

HIV: --/--/NON-REACTIVE/-- (06/24 1419)

HBSAg: NON-REACTIVE (06/24 1419)

GC: NOT DETECTED (06/29 1407)

CT: NOT DETECTED (06/29 1407)

GBS: positive

RPR: Negative (06/24 1419)

Rubella: 1.46 (06/23 1017)

Blood: A/Positive (06/24 1324)

Prenatal care: {Desc; adequate/inadequate}, \*\*\* visits at \*\*\*}

Pregnancy complications: \*\*\*

**Labor Events**

Preterm labor?: No

GBS Status: positive

Antibiotics for GBS given?: Yes

Rupture date: 07/01/2015 Rupture time: 09:00

07/01/2015

Rupture type: Artificial

Induction: AROM, Oxytocin

Augmentation: None

Additional OB: DELIVERY - COMPLICATIONS

complications: History of cesarean section

Perinatal complications: \*\*\*

Prenatal Medications:

**Medications Prior to Admission**

| Medication                                          | Sig                                            |
|-----------------------------------------------------|------------------------------------------------|
| • [DISCONTINUED] aspirin 81 MG Oral Tablet Chewable | Chew 1 tablet daily.                           |
| • ferrous sulfate 325 (65 FE) MG Oral Tablet        | Take 1 tablet by mouth daily (with breakfast). |
| • prenatal multivitamin (VITAFOL-OB) Oral Tablet    | Take 1 tablet by mouth daily.                  |

**Delivery Method:** VBAC, Spontaneous**ROM:** 13h 52m**Peds called:** {JX YES/NO}**Resuscitation:** None**Cord Blood pH:**

| pH, Cord Art | Date       | Value    | Ref Range   | Status |
|--------------|------------|----------|-------------|--------|
|              | 07/01/2015 | 7.29 (L) | 7.32 - 7.42 | Final  |

**Calculated Base Excess**

| Date       | Value | Ref Range    | Status |
|------------|-------|--------------|--------|
| 07/01/2015 | 0.5   | 0 - 2 MMOL/L | Final  |

**Admission Physical:****Birth weight:** 2990 g (6 lb 9.5 oz) (Filed from Delivery Summary)

{AGA/SGA/LGA}

**Birth Weight:** 2990 g (6 lb 9.5 oz) (Filed from Delivery Summary), {AGA/SGA/LGA}**Length:****Ht Readings from Last 1 Encounters:**

07/01/2015 48.9 cm (19.25") (27 %, Z= -0.62)\*

\* Growth percentiles are based on Fenton (Girls, 22-50 Weeks) data.

27 %ile (Z= -0.62) based on Fenton (Girls, 22-50 Weeks) Length-for-age data based on Length recorded on 07/01/2015.

**Head Circumference:****HC Readings from Last 1 Encounters:**

07/01/2015 31.5 cm (12.4") (1 %, Z= -2.26)\*

\* Growth percentiles are based on Fenton (Girls, 22-50 Weeks) data.

1 %ile (Z= -2.26) based on Fenton (Girls, 22-50 Weeks) head circumference-for-age based on Head Circumference recorded on 07/01/2015.

**Admission physical exam** was normal except for \*\*\*. Red reflex was present bilaterally on admission.**Laboratory/Diagnostic Tests:****Results for orders placed or performed during the hospital encounter of 10/26/21 (from the past 72 hour(s))****Blood Gas Arterial, Cord**

Collection Time: 07/01/2015 10:20 AM

| Result        | Value |
|---------------|-------|
| Specimen Type | Other |

|                                      |          |
|--------------------------------------|----------|
| Site                                 | V.CORD   |
| Allens Test                          | No       |
| pH, Cord Art                         | 7.35     |
| pO2, Cord Art                        | 41.0     |
| Calculated Bicarbonate               | 24.8     |
| Calculated Base Excess               | -1.1 (L) |
| Calculated O2                        | 73.2     |
| PCO Cord Arterial                    | 45       |
| <b>Blood Gas Arterial, Cord</b>      |          |
| Collection Time: 07/01/2015 10:20 AM |          |
| Result                               | Value    |
| Specimen Type                        | Other    |
| Site                                 | A.CORD   |
| Allens Test                          | No       |
| pH, Cord Art                         | 7.29 (L) |
| pO2, Cord Art                        | 19.0     |
| Calculated Bicarbonate               | 28.4     |
| Calculated Base Excess               | 0.5      |
| Calculated O2                        | 23.0     |
| PCO Cord Arterial                    | 59       |
| <b>POCT bilirubinometry</b>          |          |
| Collection Time: 07/03/2015 1:21 AM  |          |
| Result                               | Value    |
| Bilirubin Tc                         | 7.6      |

**Imaging:** No results found.

**Nutrition:** {breast, formula, breast and formula, \*\*\*}

#### Discharge Physical:

| Vitals:  | 09/02/2015 30   | 09/03/15 0125        | 09/03/15 0330     | 09/03/15 0800     |
|----------|-----------------|----------------------|-------------------|-------------------|
| BP:      |                 |                      |                   |                   |
| Pulse:   | 128             |                      | 120               | 160               |
| Resp:    | 52              |                      | 40                | 42                |
| Temp:    | 37.2 °C (99 °F) |                      | 37.1 °C (98.8 °F) | 37.4 °C (99.3 °F) |
| TempSrc: | Axillary        |                      | Axillary          | Axillary          |
| Weight:  |                 | 2830 g (6 lb 3.8 oz) |                   |                   |
| Height:  |                 |                      |                   |                   |
| HC:      |                 |                      |                   |                   |

**Discharge weight:** \*\*\*

**Weight Change Since Birth:** \*\*\*

**General:** alert, in no acute distress, no dysmorphic features

**Head:** fontanelles open, soft, flat and normal size, **HC \*\*\* cm**

**Eyes:** sclera white; pupils equal and reactive

**Ears:** well-positioned, well-formed pinnae, no preauricular sinuses or tags

**Nose:** clear, normal mucosa

**Mouth:** normal tongue, palate intact

**Neck:** normal structure

**Chest:** lungs clear to auscultation, unlabored breathing

**Heart:** regular rate and rhythm; no murmurs

**Abdomen/Anus:** soft, non-tender, non-distended; without masses or hepatosplenomegaly; anus patent; umbilical stump clean and dry

**Pulses:** strong equal femoral pulses, brisk capillary refill

**Hips:** negative Barlow, Ortolani, gluteal creases equal

**GU:** normal female genitalia

**Extremities:** well-perfused, warm and dry; clavicles intact

**Spine:** normal, symmetric, no sacral tufts, tags or dimples

**Skin:** warm, dry and intact

**Neurologic:** easily aroused; good symmetric tone and strength; positive root and suck; symmetric normal reflexes

### Newborn Hearing Screen (OAE):

**Right Ear: Pass**

**Left Ear: Pass**

### Immunization History

Administered

Date(s) Administered

- **Hepatitis B Vaccine (Peds/Adol 3-dose), IM** **07/01/2015/**

**Anticipatory guidance performed:** risks of co-sleeping, **breast feeding\*\*\***, formula feeding, bowel movements, bathing and cord care, **circumcision care\*\*\***, dental care, temperature, activity, smoking, stimulation, back to sleep, shaken baby syndrome, car seat safety, baby blues and when to call the doctor. Standard newborn care instructions and anticipatory guidance were provided to the mother prior to discharge.

### Patient Active Problem List

Diagnosis

- **Single liveborn infant delivered vaginally**

**Hospital Course:** **Baby GIRL/Test Test** was born on **07/01/2015** at **0920** at **Gestational Age: 39w6d** via **Delivery Method: VBAC, Spontaneous** to a **24 y.o. G2P2002**. Peds {WAS/WAS NOT} called and no resuscitation was required. \*\*\* Baby did well overall and has fed, voided and stoolled appropriately. Mom received anticipatory guidance on caring for her new baby. No other acute issues arose during this admission. Baby deemed medically stable for discharge. Baby to f/u with \*\*\* in 1-2 days.

- Baby's 24 hour CCHD Screen: **SpO2: Pre-Ductal (Right Hand): 97 % and SpO2: Post-Ductal (Either Foot): 98 % Critical Congenital Heart Defect Score: Negative**
- Baby's 40 hour bilirubin was \*\*\*
- Birth weight was **2990 g (6 lb 9.5 oz) (Filed from Delivery Summary)**
- Discharge weight was **2830 g (6 lb 3.8 oz) (07/03 0125)**
- Admission weight change of **-5%**

**Studies pending:** {None:"None"}  
**Special Follow-up Needed:** {None:"None"}

Me, MD

07/03/2015 10:30 AM

**Example 6: Discharge summary post-optimization**

Blue highlight: Auto generated data. \*\*\*: Manual entry of data required. { }: Pick list. Epic codes are omitted.

Yo: Year old. GP: Gravida para. HIV: Human immunodeficiency virus, HBSAg: Hepatitis B antigen. GC: Gonorrhea. CT: Chlamydia. GBS: Group B streptococcus. RPR: Rapid plasma reagin. VBAC: Vaginal birth after cesarean section. ROM: Rupture of membranes. Peds: Pediatrics. GA: Gestational age. AGA: Appropriate for gestational age. SGA: Small for gestational age. LGA: Large for gestational age. OAE: Otoacoustic emissions. SpO2: Oxygen saturation. Bili: Bilirubin.
